# Supplementary material
Source: HighWire-hosted journal article supplement (https://jitc.bmj.com/content/10/12/e005436)
Supplement: inline-supplementary-material-4 [file inline-supplementary-material-4.xlsx]

## Sheet: Sheet1
Table S3. Antibodies used in flow cytometry
Antibody	Fluoroscence	Clone	Identifier	Vendor
anti-human CD45	FITC	HI30	555482	BD Pharmingen
anti-human CD11b	APC-Cy7	ICRF44	557754	BD Pharmingen
anti-human CD33	BV605	HIM3-4	744352	BD Pharmingen
anti-human HLA-DR	Percp5.5	L243	560652	BD Pharmingen
anti-human CD14	AF700	M5E2	557923	BD Pharmingen
anti-human CD15	BV510	W6D3	563141	BD Pharmingen
anti-human CD68	PEcy7	Y1/82A	565595	BD Pharmingen
anti-human CD86	PE	FUN-1	555658	BD Pharmingen
anti-human CD206	BV650	19.2	740598	BD Pharmingen
anti-human CD11c	BV421	B-LY6	562561	BD Pharmingen
anti-human CD39	APC	TU66	560239	BD Pharmingen
anti-human CD3	APC-Cy7	SK7	557832	BD Pharmingen
anti-human CD4	AF700	RPA-T4	557922	BD Pharmingen
anti-human CD25	PE	BC96	12-0259-42	eBioscience
anti-human Foxp3	PEcy7	PCH101	25-4776-42	eBioscience
anti-human CD8	BV510	SK1	563919	BD Pharmingen
anti-human Granzyme B	PE	GB11	561142	BD Pharmingen
anti-human Ki67	PEcy7	B56	561283	BD Pharmingen
anti-human CD38	APC-R700	HIT2	564979	BD Pharmingen
anti-human CD16	Percp5.5	3G8	302028	Biolegend
anti-human CD66	BV605	B1.1/CD66	740423	BD Pharmingen
anti-human IL-4	BV421	MP4-25D2	564110	BD Pharmingen
anti-human IL-17A	PE	SCPL1362	560436	BD Pharmingen
Fixable Viability Stain 620	PE-CF594	—	564996	BD Pharmingen
anti-mouse CD45	APC-Cy7	30-F11	557659	BD Pharmingen
anti-mouse CD8a	PerCP-Cy5.5	53-6.7	561109	eBioscience
anti-mouse CD39	PEcy7	24DMS1	25-0391-82	eBioscience
anti-mouse granzymeB	AF647	GB11	515406	BD Pharmingen
anti-mouse Ki67	BV605	16A8	652413	BD Pharmingen
Fixable Viability Stain 700	FVS700	—	564997	BD Pharmingen
