# Supplementary material
Source: HighWire-hosted journal article supplement (https://jitc.bmj.com/content/10/12/e005436)
Supplement: inline-supplementary-material-6 [file inline-supplementary-material-6.xlsx]

## Sheet: Sheet1
Table S4. Definition of cell populations
Cell Type	Markers
Dendritic cells	CD45+CD11b+CD11c+HLA-DR+
Macrophage	CD45+CD11b+CD11c-CD68+HLA-DR+(M1-like:CD86+, M2-like:CD206+)
MDSC	CD45+CD11b+CD33+HLA-DR-(M-MDSC:CD14+CD15-,PMN-MDSC:CD15+CD14-)
Th1	CD45+CD3+CD4+IFN-R+
Th2	CD45+CD3+CD4+IL-4+
Th17	CD45+CD3+CD4+IL-17+
Treg	CD45+CD3+CD4+CD25+Foxp3+
Neutrophils	CD45+CD16+CD66+
B cells	CD45+CD3+CD19+
NK cells	CD45+CD3-CD56+
CD8+T cells	CD45+CD3+CD8+
CD4+T cells	CD45+CD3+CD4+
